# Supplementary material for: Study on Sensing Mechanism of Volatile Organic Compounds Using Pt-Loaded ZnO Nanocrystals
Source: MDPI journal article supplement (doi:10.3390/s22166277), 2022-08-20
Supplement: s1 [file s1]

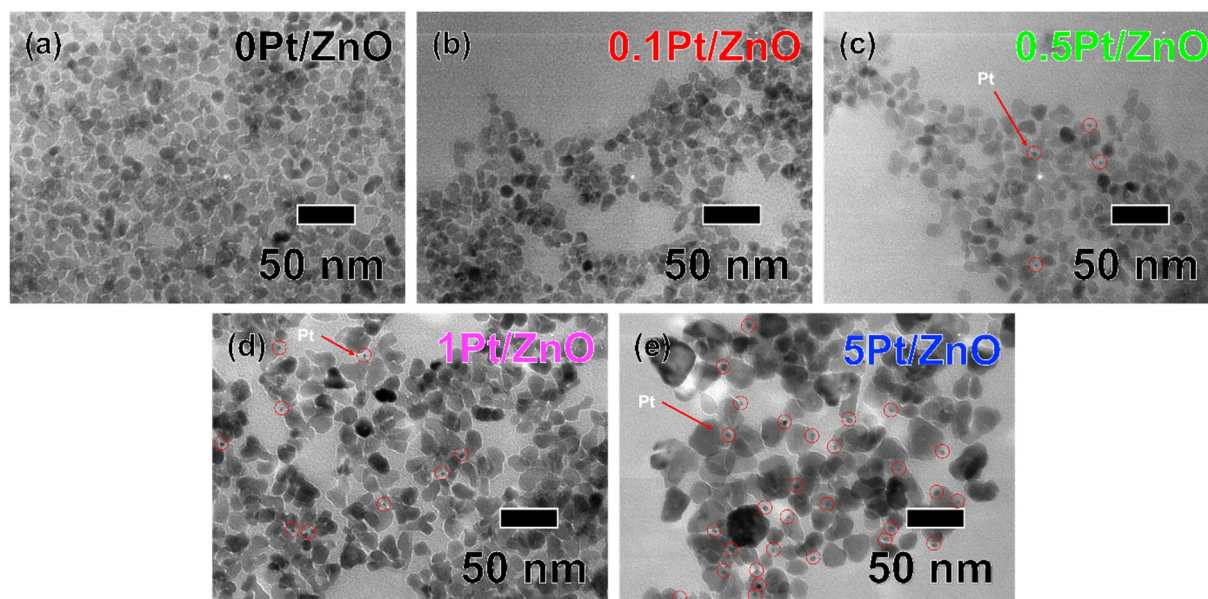

**Figure S1.** TEM images of (a) 0Pt/ZnO, (b) 0.1Pt/ZnO, (c) 0.5Pt/ZnO, (d) 1Pt/ZnO, and (e) 5Pt/ZnO NCs.

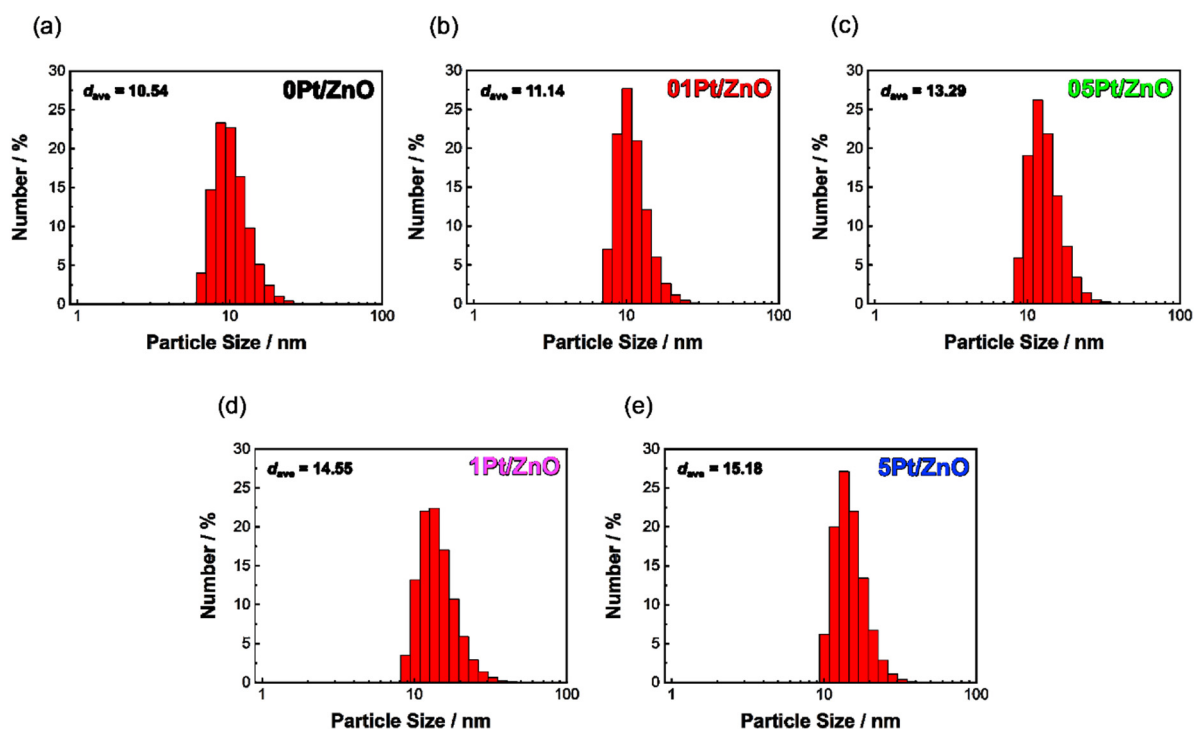

**Figure S2.** Colloidal size distributions of (a) 0Pt/ZnO, (b) 0.1Pt/ZnO, (c) 0.5Pt/ZnO, (d) 1Pt/ZnO, and (e) 5Pt/ZnO NCs in toluene.

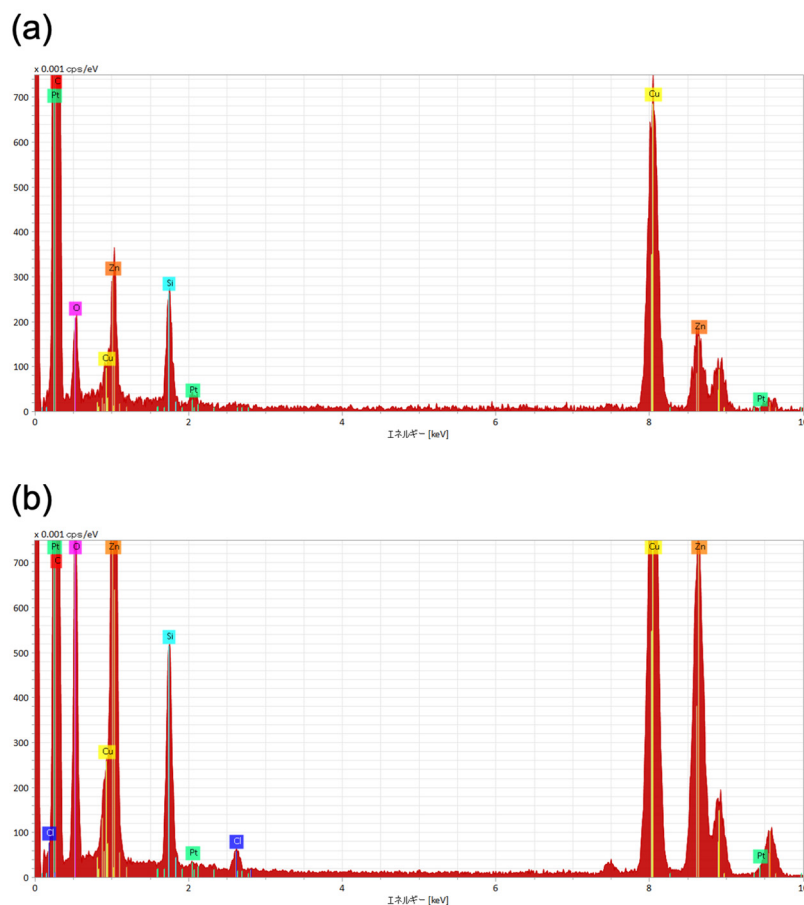

**Figure S3.** EDS spot spectra of (a) 0.1Pt/ZnO and (b) 5Pt/ZnO NCs.

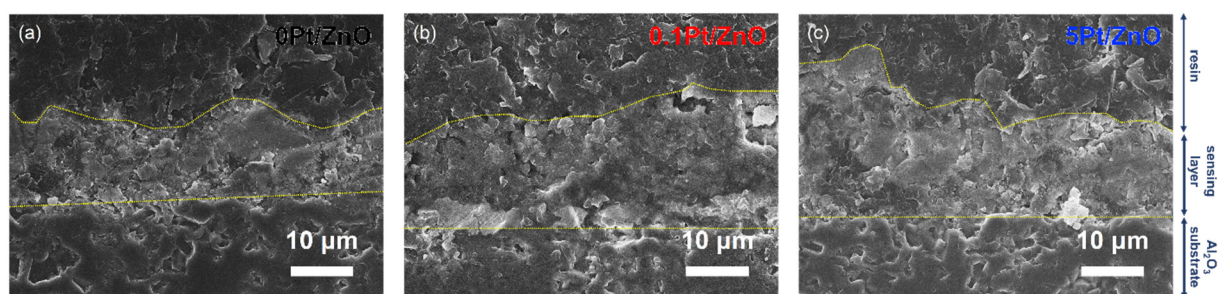

**Figure S4.** Cross-sectional SEM images of the sensor devices made of (a) 0Pt/ZnO, (b) 0.1Pt/ZnO, and (c) 5Pt/ZnO NCs. The thickness of the sensing layers composed of 0Pt/ZnO, 0.1Pt/ZnO, and 5Pt/ZnO is 13.5, 18.2, and 17.9  $\mu\text{m}$ , respectively.

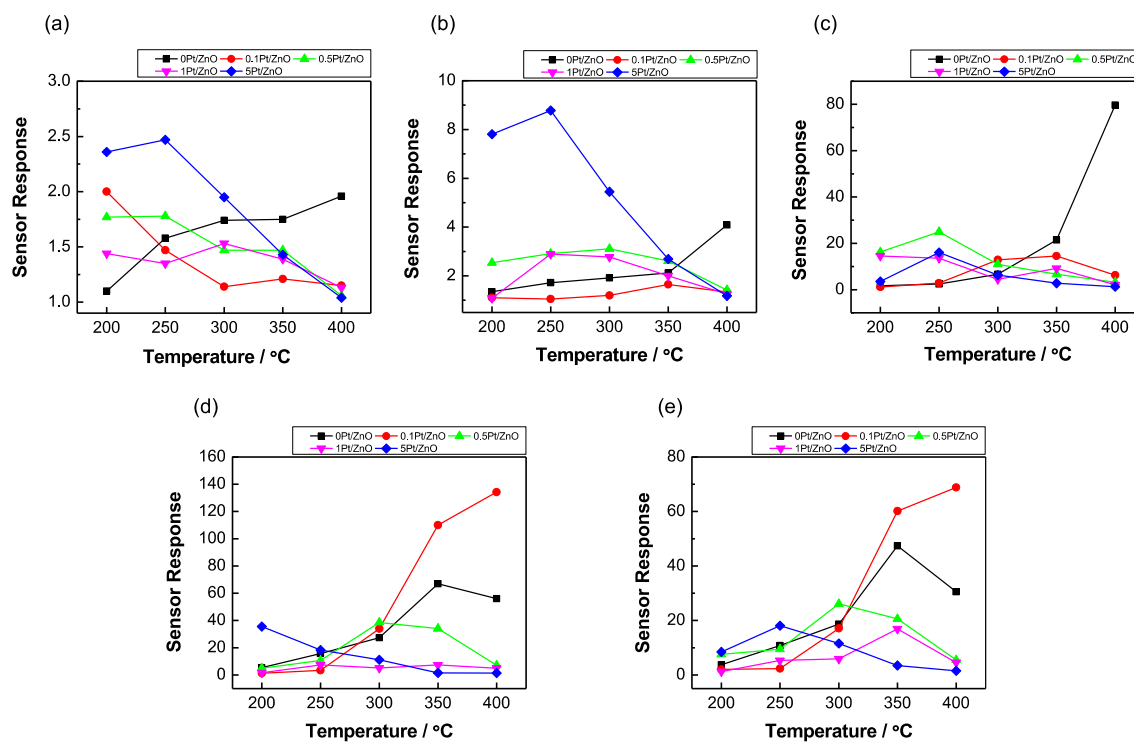

**Figure S5.** Temperature dependence of the sensor response to (a) CO, (b) H<sub>2</sub>, (c) toluene, (d) acetone, and (e) ethanol for five different sensors.

**Table S1.** Pt loading amounts on ZnO NCs.

| Sample    | *Pt Loading (w%) |
|-----------|------------------|
| 0.1Pt/ZnO | 0.236            |
| 0.5Pt/ZnO | 0.560            |
| 1Pt/ZnO   | 0.705            |
| 5Pt/ZnO   | 2.691            |

\*The loading amounts were determined by XRF analysis.
